# Dynamic Change of Electrostatic Field in TMEM16F Permeation Pathway Shifts Its Ion Selectivity

Wenlei Ye<sup>1</sup>, Tina W. Han<sup>1</sup>, Mu He<sup>1</sup>, Yuh Nung Jan<sup>1,2,3</sup>, Lily Y. Jan<sup>1,2,3</sup>, \*

<sup>1</sup> Department of Physiology, <sup>2</sup> Howard Hughes Medical Institute, <sup>3</sup> Department of Biochemistry and Biophysics, University of California, San Francisco, CA 94143

\* To whom correspondence should be addressed. Email: Lily.Jan@ucsf.edu.

## Abstract

TMEM16F is activated by elevated intracellular  $\text{Ca}^{2+}$ , and functions both as a small-conductance ion channel permeable to  $\text{Ca}^{2+}$  and as a phospholipid scramblase. It is important to hold this positive feedback in check to prevent prolonged  $\text{Ca}^{2+}$ -overloading in cells. We hypothesize that TMEM16F shifts its ion selectivity so that it is more permeable to  $\text{Cl}^-$  than cations at high intracellular  $\text{Ca}^{2+}$  concentration. We tested this hypothesis with the Q559K mutant that shows no current rundown in excised patch with prolonged  $\text{Ca}^{2+}$  elevation. Recorded in NaCl-based solution, the channel shifted its ion selectivity from  $\text{Na}^+$ -selective to  $\text{Cl}^-$ -selective when intracellular  $\text{Ca}^{2+}$  was increased. The ion selectivity switch did not correlate with changes of channel open state. Rather, it was indicative of an alteration of electrostatic field in the permeation pathway. Shifting ion-selectivity synergistically by intracellular divalent ions and membrane potential could work as a built-in mechanism that allows TMEM16F to brake the positive feedback.

## Key words

TMEM16F, Ion selectivity, scramblase, calcium-activated chloride channel, small-conductance cation channel

## Introduction

Mammalian TMEM16F is a membrane protein with dual functions of phospholipid scrambling and ion conduction, both activated by elevation of intracellular  $\text{Ca}^{2+}$  (1-4). When activated, TMEM16F mediates the exposure of phosphatidylserine, a lipid normally restricted to the inner leaflet of cell membrane lipid bilayer, to the cell surface (5). This process, known as lipid scrambling, initiates many physiological processes such as recruitment of thrombin to the platelet surface to trigger blood coagulation and induction of immune responses in T lymphocytes (5-8). TMEM16F is also a  $\text{Ca}^{2+}$ -activated small-conductance ion channel, yielding non-selective cation current in excised patch recordings (6, 9). Consistently, activation of TMEM16F increases cytoplasmic  $\text{Ca}^{2+}$  concentration in cells that heterologously express this channel (10). The intracellular  $\text{Ca}^{2+}$  elevation might further activate TMEM16F, forming positive feedback that could potentially lead to detrimental consequences. We have shown that in response to high cytoplasmic  $\text{Ca}^{2+}$ , degradation of phosphatidylinositol-(4,5)-bisphosphate ( $\text{PIP}_2$ ), a lipid mostly in the cytoplasmic leaflet of cell membrane, could serve as a brake to terminate TMEM16F activation (11). For this brake mechanism to be effective,  $\text{PIP}_2$  degradation needs to be faster than its synthesis in native cells. Moreover, the residual TMEM16F current may still be able to contribute to the positive feedback. We hence searched for intrinsic mechanisms to terminate the positive feedback resulting from TMEM16F activation by  $\text{Ca}^{2+}$  and its ability to permeate  $\text{Ca}^{2+}$  ions.

There is discrepancy regarding TMEM16F ion selectivity reported by different labs. Recorded with excised-patch inside-out configuration, TMEM16F channels are quickly activated by micromolar  $\text{Ca}^{2+}$  and they are more permeable to cations (mainly physiological cations such as  $\text{Na}^+$ ,  $\text{K}^+$  and  $\text{Ca}^{2+}$ ) than  $\text{Cl}^-$ , while prolonged treatment by  $\text{Ca}^{2+}$  leads to current inactivation (6, 9). Surprisingly, many groups reported that TMEM16F whole-cell current is activated several minutes after  $\text{Ca}^{2+}$  elevation, and it displays less cation-selectivity (12) or even greater selectivity for  $\text{Cl}^-$  than  $\text{Na}^+$  (13-16). This paradox has not been resolved, but nonetheless it suggests that prolonged treatment with high cytoplasmic  $\text{Ca}^{2+}$  is correlated with a reduction of TMEM16F cation selectivity. Interestingly, recent studies suggested that intracellular  $\text{Ca}^{2+}$  might alter the accessibility of different ions to the permeation pathway of TMEM16A, a  $\text{Ca}^{2+}$ -activated anion channel paralog of TMEM16F (17). We thus hypothesize that TMEM16F shifts its ion selectivity in response to elevation of intracellular  $\text{Ca}^{2+}$  concentrations. However, because TMEM16F current in inside-out excised patch exhibits rapid desensitization and rundown in high

$\text{Ca}^{2+}$ , it is challenging to test for TMEM16F ion selectivity under such a variety of  $\text{Ca}^{2+}$  concentrations.

Here, we report that TMEM16F Q559K current persisted with prolonged exposure to high intracellular  $\text{Ca}^{2+}$ . Previous studies have indicated that Q559 faces the ionic permeation pathway and that lysine substitution reduces TMEM16F cation selectivity (6, 9), and we now further show that this mutant displays different  $\text{Na}^+/\text{Cl}^-$  selectivity in different  $\text{Ca}^{2+}$  concentrations. The difference in ion selectivity did not correlate with alterations of the open states, but instead was regulated by the electrostatic change along the permeation pathway, on which divalent ions (such as  $\text{Ca}^{2+}$  and  $\text{Zn}^{2+}$ ) had more significant impact than monovalent ions. Furthermore, membrane depolarization, which facilitates intracellular cation entry into the membrane electric field, promoted the selectivity shift toward a preference for  $\text{Cl}^-$  over cations. The shift of cation/anion selectivity could reflect a general feature of how cytoplasmic ions might influence the function of TMEM16 proteins, and it suggests that TMEM16F harbors an inherent machinery that allows it to switch from being cation-selective to being  $\text{Cl}^-$ -selective to brake the signals and the ensuing positive feedback.

## Results

### TMEM16F Q559K shifts ion selectivity towards $\text{Cl}^-$ as intracellular $\text{Ca}^{2+}$ increases.

Recorded with inside-out configuration and held at +80 mV, wild-type TMEM16F current was activated by intracellular  $\text{Ca}^{2+}$  in a dose-dependent manner. The current started to decrease when  $\text{Ca}^{2+}$  was higher than  $\sim 30 \mu\text{M}$ , as a result of both desensitization and rundown (*Figure 1A, C, D*) (11). Here, desensitization refers to a decreased sensitivity to  $\text{Ca}^{2+}$ , caused by degradation of  $\text{PIP}_2$  via membrane-tethered phospholipase activated by high intracellular  $\text{Ca}^{2+}$ . Rundown refers to a reduction of fully-activated current magnitude (induced by 1 mM  $\text{Ca}^{2+}$  in this case). The rapid decrease of current rendered it difficult to record the reversal potential of wild-type TMEM16F in 1 mM  $\text{Ca}^{2+}$ , because when we switched the bath (equivalent to intracellular solution) from 150 mM NaCl to 15 mM NaCl, the currents recorded from *Tmem16f*-transfected cells were indistinguishable from currents endogenous to HEK293 cells (*Figure 1–figure supplement 1A, B, C*). Consistent with previous reports (6, 9), TMEM16F current induced by 15  $\mu\text{M}$   $\text{Ca}^{2+}$  was selective for  $\text{Na}^+$  over  $\text{Cl}^-$  (*Figure 1E*).

In contrast, the mutant Q559K current recorded in the same condition showed minimal rundown in 1 mM  $\text{Ca}^{2+}$ , in spite of desensitization to  $\text{Ca}^{2+}$ -activation likely due to  $\text{PIP}_2$  depletion. Normalized to the maximal magnitudes of the current before and after 1-minute-treatment of 1 mM  $\text{Ca}^{2+}$ ,  $\text{EC}_{50}$  of  $\text{Ca}^{2+}$ -activation was shifted from  $5.6 \pm 0.3 \mu\text{M}$  to  $52 \pm 11 \mu\text{M}$  (Figure 1B, C), while the normalized fully-activated current magnitude was  $0.89 \pm 0.18$  (current in 1 mM  $\text{Ca}^{2+}$  normalized to that before 1 mM  $\text{Ca}^{2+}$ ), significantly different from  $0.36 \pm 0.13$  for wild type (Figure 1D). We recorded with a voltage-family protocol from -40 mV to +160 mV with 10 mV increment followed by holding at 100 mV to obtain "tail-currents", which we used as indicators of conductance. Fitting to the sigmoidal G-V relationship yielded  $V_{1/2}$  of  $76 \pm 11$  mV in  $15 \mu\text{M}$   $\text{Ca}^{2+}$  for wild-type TMEM16F, while in 1 mM  $\text{Ca}^{2+}$ , the depletion of  $\text{PIP}_2$  strongly reduced the voltage-gating, consistent with our previous reports (Figure 1-figure supplement 2A, D) (11). Depletion of  $\text{PIP}_2$  caused a right-shift of the voltage-dependence of Q559K current in  $15 \mu\text{M}$   $\text{Ca}^{2+}$ , but in 1 mM  $\text{Ca}^{2+}$  the left-shift otherwise overrode the effect of  $\text{PIP}_2$  depletion, with  $V_{1/2}$  being  $18 \pm 10$  (Figure 1-figure supplement 2B, C, D). Thus, the mutation of Q559K allowed us to record TMEM16F current around physiological membrane voltages in a wide-range of  $\text{Ca}^{2+}$ , here particularly, to measure  $E_{\text{rev}}$  in 1 mM  $\text{Ca}^{2+}$ .

Interestingly, the  $E_{\text{rev}}$  of TMEM16F Q559K current activated by 1 mM  $\text{Ca}^{2+}$  exhibited a left-shift to  $-14 \pm 1$  mV in 15 mM NaCl, suggesting that it was selective for  $\text{Cl}^-$  over  $\text{Na}^+$  (Figure 1F, G and Figure 1-figure supplement 1D). Corrected for liquid junction potentials calculated with Clampex, this result indicated that the permeability ratio for  $\text{Na}^+$  over  $\text{Cl}^-$  was  $0.47 \pm 0.03$ , in contrast to  $2.1 \pm 0.4$ , calculated from  $E_{\text{rev}}$  in  $15 \mu\text{M}$   $\text{Ca}^{2+}$ . To test whether the inversion of ion selectivity was due to  $\text{PIP}_2$  depletion, we compared the values of  $E_{\text{rev}}$  in  $15 \mu\text{M}$   $\text{Ca}^{2+}$  before and after perfusion of poly-L-lysine (PLL), which could sequester  $\text{PIP}_2$  from the membrane. After PLL treatment the current in  $15 \mu\text{M}$   $\text{Ca}^{2+}$  recorded at +80 mV was too small, so for this experiment we held the patch at +160 mV followed by the hyperpolarizing ramp. Judging from the currents with acceptable magnitudes, the  $E_{\text{rev}}$  shift was minor, significantly different from that in 1 mM  $\text{Ca}^{2+}$  (Figure 1-figure supplement 1E, F). Thus,  $\text{PIP}_2$  depletion cannot account for the inversion of ion selectivity of Q559K current.

TMEM16F functions as a cation channel because it is more permeable to physiological cations ( $\text{Na}^+$ ,  $\text{K}^+$  and  $\text{Ca}^{2+}$ ) than  $\text{Cl}^-$ , even though the permeability for many other cations may be lower than that for  $\text{Cl}^-$  (6, 12). Like wild-type TMEM16F, Q559K channels are more permeable to  $\text{I}^-$  than  $\text{Cl}^-$  (Figure 1-figure supplement 3). In this study, we will mainly focus on the comparison between  $\text{Na}^+$  permeability and  $\text{Cl}^-$  permeability. Given the variable  $P_{\text{Na}^+}/P_{\text{Cl}^-}$ , we cannot employ

the calculation methods normally used for bi-ionic conditions to analyze data obtained with solutions involving a third ion species.

### **Q559K channel ion selectivity varies with intracellular $\text{Ca}^{2+}$ concentration**

We asked whether the two phases of ion selectivity of the Q559K mutant channel corresponds to multiple open states that may correlate with different extent of occupancy of the  $\text{Ca}^{2+}$  binding sites; For example, the channel may be in an intermediate state in  $15\ \mu\text{M}\ \text{Ca}^{2+}$  but a fully open state in  $1\ \text{mM}\ \text{Ca}^{2+}$ . To test this possibility, we made use of the  $\text{Ca}^{2+}$ -binding-site mutant, E667Q, whose  $\text{EC}_{50}$  of  $\text{Ca}^{2+}$ -activation is shifted to the right, to dissociate the effect of  $\text{Ca}^{2+}$  concentration from those attributable to different open states of the channel (6, 9). The  $\text{EC}_{50}$  of the double-mutant, Q559K\_E667Q, was  $0.88 \pm 0.06\ \text{mM}$ , suggesting that the double mutant should not be in the fully open state in  $1\ \text{mM}\ \text{Ca}^{2+}$  (*Figure 2A, B*). However, the  $E_{\text{rev}}$  of the current activated by  $1\ \text{mM}\ \text{Ca}^{2+}$  was  $-6.9 \pm 2.0\ \text{mV}$ , corresponding to a  $\text{Cl}^-$  selective channel (*Figure 2C, D*). This indicates either that TMEM16F ion selectivity is not correlated with its open state, or that the E667Q mutation circumvents the intermediate open state (if any) and causes the mutant channel to directly enter a fully-open conformation.

To further investigate the activation of TMEM16F, we aligned the sequence of its transmembrane helix 6 (TM6) with that of TMEM16A, which plays a critical role in TMEM16A channel gating. In TMEM16A, the glycine in TM6 (G640 or G644 depending on isoform) works as a hinge to allow the rearrangement of the helical segments during channel activation to generate an ionic permeation pathway (18, 19); Alanine substitution of this glycine stabilizes TM6 at the open conformation, and increases the  $\text{Ca}^{2+}$  sensitivity of TMEM16A (18, 19). Similarly, alanine substitution of G615 of TMEM16F increased the  $\text{Ca}^{2+}$  sensitivity (9, 10) and caused a left-shift of the voltage dependence recorded in  $15\ \mu\text{M}\ \text{Ca}^{2+}$  (*Figure 3A, B*). Notably, the glutamine at the lower segment of TM6 in TMEM16A, Q645, whose alanine substitution stabilizes the channel at a conformation similar to wild-type TMEM16A bound to one  $\text{Ca}^{2+}$  ion (18), corresponds to a gap of the alignment in TMEM16F (*Figure 3–figure supplement 1A*). Alanine substitution of the asparagine “5-amino-acid-away” in TMEM16F TM6, N620, did not alter  $\text{Ca}^{2+}$  sensitivity (10) or voltage gating (*Figure 3–figure supplement 1B, C*). In contrast, alanine substitution of the isoleucine I612 caused shifts in  $\text{Ca}^{2+}$ - and voltage-gating (10) comparable to the effect of alanine substitution of I637 at the corresponding position in TMEM16A (*Figure 3–figure supplement 1D, G*) (18). The comparison of gating between

TMEM16A and TMEM16F is beyond the scope of this manuscript but will be briefly discussed later.

Notably, the voltage-dependence of TMEM16F G615A channels in 15  $\mu\text{M}$   $\text{Ca}^{2+}$  was comparable to that of Q559K channels in 1 mM  $\text{Ca}^{2+}$  (*Figure 3A, B*), suggesting that removing the TM6 glycine hinge also stabilized the TMEM16F open conformation. We then generated the double-mutant Q559K\_G615A to study its ion selectivity. The switch from  $\text{Na}^+$ -selective to  $\text{Cl}^-$ -selective was preserved in this double mutant (*Figure 3C, D*). Our study of two different double mutants reveal that, in the presence of Q559K, 15  $\mu\text{M}$   $\text{Ca}^{2+}$  elicited a cation-selective current regardless of TM6 stabilization (*Figure 3*), while current in 1 mM  $\text{Ca}^{2+}$  was  $\text{Cl}^-$ -selective even if the channel was not fully activated to reach the plateau level in the  $\text{Ca}^{2+}$  dependence curve (*Figure 2*). These results suggest that TMEM16F ion selectivity more likely depends on intracellular  $\text{Ca}^{2+}$  concentration directly rather than its open state(s), and it remains possible that the selectivity could be influenced by other regulatory factors.

### **The switch of ion selectivity correlates with electrostatic change in permeating pathway**

Intrigued by the possibility that  $\text{Ca}^{2+}$  alters anion accessibility to TMEM16A pore through electrostatic effect (17), we hypothesize that the shift of ion selectivity of TMEM16F Q559K in response to elevation of intracellular  $\text{Ca}^{2+}$  is due to a change of electrostatic field along its permeation pathway. In this scenario, the effect ought to be elicited not only by  $\text{Ca}^{2+}$  but also by other divalent cations (17). Here, we chose to test  $\text{Zn}^{2+}$ , a divalent cation that is smaller but also capable of activating TMEM16F. Wild-type TMEM16F activation by 1  $\mu\text{M}$   $\text{Zn}^{2+}$  was similar in magnitude to that by  $\sim 10$   $\mu\text{M}$   $\text{Ca}^{2+}$  with or without  $\text{PIP}_2$  depletion (*Figure 4A, B*).  $\text{Zn}^{2+}$ -activation of TMEM16F was coupled with rapid inactivation, precluding the possibility to accurately plot the dose-response curve. Since exposure to divalent-free solution (with EGTA) for  $\sim 30$  s to 1 min following channel activation by  $\text{Zn}^{2+}$  allowed the TMEM16F current, whether activated by  $\text{Ca}^{2+}$  or by  $\text{Zn}^{2+}$ , to fully recover in magnitude (*Figure 4—figure supplement 1*), the rapid current rundown cannot be attributed to desensitization triggered by degradation of  $\text{PIP}_2$ .

We found that the wild-type TMEM16F channels activated by 10  $\mu\text{M}$   $\text{Zn}^{2+}$  was selective for  $\text{Na}^+$  over  $\text{Cl}^-$ , as evidenced from the right-shift in  $E_{\text{rev}}$  as intracellular  $\text{NaCl}$  dropped to 15 mM (*Figure 4C*). The reversal potential in 1 mM  $\text{Zn}^{2+}$  could not be determined owing to the rapid current

inactivation. TMEM16F Q559K channels also exhibited a shift from being Na<sup>+</sup>-selective to being Cl<sup>-</sup>-selective with elevation of Zn<sup>2+</sup> concentration from 10 μM to 1 mM (*Figure 4C, D, E*). The shift of ion selectivity therefore represents an inherent feature of TMEM16F Q559K channels regardless of the divalent ion species.

Although monovalent ions generate weak electrostatic fields compared with divalent ions, due to their abundance they should also be able to regulate the electrostatic field along TMEM16F permeation pathway and shift the ion selectivity. TMEM16F is permeable to most generally-used cations (6, 12), so introducing any other ion will cause difficulties in distinguishing whether the shift of  $E_{rev}$  is due to the change of  $P_{Na^+}/P_{Cl^-}$  or to the permeation of the third ion species. Thus, we measured the  $E_{rev}$  with different intracellular NaCl concentrations and calculated the respective permeability ratios. When bath (equivalent to intracellular solution) was changed from 15 mM NaCl to 45 mM NaCl and the holding potential was held constant at +80 mV, the driving potential for Na<sup>+</sup> moving across the membrane was changed by more than 2 folds (from ~20 mV to ~50 mV), while the shift of driving potential for Cl<sup>-</sup> was smaller (from ~140 mV to ~110 mV). We expected that the increase of the "Na<sup>+</sup>-component" of the current would reduce Na<sup>+</sup> selectivity. Indeed, the calculated  $P_{Na^+}/P_{Cl^-}$  measured in 15 μM Ca<sup>2+</sup> declined from  $4.8 \pm 0.6$  to  $2.3 \pm 0.2$  for wild-type TMEM16F, and from  $2.1 \pm 0.4$  to  $1.4 \pm 0.1$  for Q559K (*Figure 5*). In 1 mM Ca<sup>2+</sup>, switching from 15 mM NaCl to 45 mM NaCl did not significantly alter the  $P_{Na^+}/P_{Cl^-}$  for Q559K, suggesting that Cl<sup>-</sup> permeability in 15 mM NaCl was already "saturated" (*Figure 5*). The shift of  $E_{rev}$  by changing the monovalent ion concentration is also consistent with our proposed scenario that the shift of ion selectivity is not due to TM6 conformational change induced by Ca<sup>2+</sup> entering its binding pockets, but instead, due to the change of electrostatic field along the permeation pathway.

### **Intracellular Ca<sup>2+</sup> and depolarization regulate ion selectivity synergistically**

Previous studies have shown the synergy between intracellular Ca<sup>2+</sup> and membrane depolarization in activating TMEM16A and TMEM16F channels (11, 18). Depolarization facilitates Ca<sup>2+</sup> entry into the membrane electric field and thus reducing EC<sub>50</sub> for channel activation. To test whether ion selectivity is also regulated synergistically by Ca<sup>2+</sup> and depolarization, we held the excised membrane patch at potentials ranging from +40 to +160 mV with an increment of 40 mV (referred to as "condition potentials") followed by a hyperpolarizing



ramp from +80 mV to -80 mV (-2 V/s), to measure the reversal potentials (*Figure 6A*). With this experimental design, the measured  $E_{rev}$  could not be directly used to calculate the ion selectivity at the condition potentials, but the shift of values with membrane potential nonetheless provides an indication of the changing selectivity. Using this method, we measured the  $E_{rev}$  of TMEM16F Q559K channels in 15  $\mu$ M, 100  $\mu$ M and 1 mM  $Ca^{2+}$ . Overall, currents tended to be more  $Cl^-$ -selective as the intracellular  $Ca^{2+}$  concentration was raised. Moreover, in every given  $Ca^{2+}$  concentration, the more depolarized the condition potential, the greater the  $Cl^-$ -selectivity (*Figure 6C, E*). The ability of depolarization to cause a gradual transition of ion selectivity from  $Na^+$  selective towards  $Cl^-$  selective can be attributed to intracellular  $Ca^{2+}$  being driven into the membrane electric field and/or altered driving force for monovalent ion permeation. The former is likely to have greater contribution because divalent ions have large impacts on the electrostatic field.

In the proposed model for TMEM16A gating (17),  $Ca^{2+}$  not only elicits conformational change of TM6,  $Ca^{2+}$  entry from the cytoplasm to occupy its binding pockets changes the electrostatic field along the permeation pathway, so as to attract  $Cl^-$  to the pore. In our experiment, 0.2  $\mu$ M  $Ca^{2+}$  combined with a mild depolarization might have "saturated" the  $Cl^-$  permeability of TMEM16A channels. It is also possible that  $Ca^{2+}$  quickly retreated from the channel with the hyperpolarizing ramp, so that the  $E_{rev}$  measured with our method remained constant in spite of various condition potentials (*Figure 6B, E*). However, TMEM16A K584Q channels displayed reduced  $Cl^-$  selectivity in 0.4  $\mu$ M  $Ca^{2+}$ , but not in 1 mM  $Ca^{2+}$  (*Figure 6-figure supplement 1*). TMEM16F wild-type channels also displayed a general tendency for the ion selectivity to favor  $Cl^-$  as the condition potential was raised (*Figure 6D, E*). Given that we determined the  $E_{rev}$  with the same hyperpolarizing ramp, these measurements likely underestimated the difference of ion selectivity at different holding potentials.

### **Wild-type TMEM16F ion selectivity shifts dynamically with recording conditions**

The above results suggest that TMEM16F ion selectivity is shifted by the change of electrostatic field along its permeation pathway, which is determined by cytoplasmic  $Ca^{2+}$  concentration, permeating monovalent ions and membrane potential. These factors contribute to the discrepancy of TMEM16F ion selectivity reported in the literature. In whole-cell recording, the pipette solution contained 150 mM NaCl and the reversal potential was obtained with a



hyperpolarizing ramp following a holding potential of +80 mV. Compared with inside-out recording as in *Figure 5*, higher intracellular NaCl concentration led to a larger driving force for Na<sup>+</sup> permeation, and thus the channel was expected to be more selective for Cl<sup>-</sup>. Indeed, the shift of reversal was  $1.4 \pm 3.1$  mV, indicative of  $P_{Na^+}/P_{Cl^-}$  of  $1.0 \pm 0.1$  (*Figure 7A, C*). With different extracellular solutions, the pattern of  $E_{rev}$  shift was seemingly indicative of a typical Cl<sup>-</sup> channel (*Figure 7B, C*). However, we could not calculate the selectivity of these ions due to the potential variation of  $P_{Na^+}/P_{Cl^-}$  in these conditions.

For most of the published results and all the data shown above,  $E_{rev}$  measurements are made after the solution change is complete and the current alteration has reached equilibrium. Here, we switched from 15  $\mu$ M Ca<sup>2+</sup> to 1 mM Ca<sup>2+</sup> in 15 mM NaCl and immediately recorded the reversal potential with inside-out configuration. With this protocol, we found a left-shift of  $E_{rev}$  accompanied with rapid inactivation, until the current was too small to be distinguishable from endogenous current (*Figure 7D, E, F*). The fact that  $E_{rev}$  shifted rapidly in response to elevation of Ca<sup>2+</sup> and then remained steady during the current decay supports our hypothesis that TMEM16F ion selectivity depends on Ca<sup>2+</sup> concentration (when membrane potential is held constant and NaCl concentration does not change). Thus, wild-type TMEM16F dynamically undergoes the transition from being Na<sup>+</sup> selective to being Cl<sup>-</sup> selective with elevation of cytoplasmic Ca<sup>2+</sup> concentration. This Cl<sup>-</sup>-selective current is transient in excised patch. In cells, the intracellular monovalent ions might be statically isotonic (~150 mM, without the ten-fold change experimentally imposed as in our excised patch recording), there might be PIP<sub>2</sub> re-synthesis that could have slowed down the inactivation due to desensitization, and the summation of the "residual current" might be large enough, which could all account for the observation that TMEM16F current appears not only with a delayed activation in whole-cell recording but also with selectivity for Cl<sup>-</sup> over Na<sup>+</sup>.

## Discussion

TMEM16F recorded with excised patch is selective for cations (6, 9). In cells with TMEM16F expression, cytoplasmic Ca<sup>2+</sup> concentration increases when TMEM16F is activated (10). These findings made us wonder how TMEM16F could terminate such positive feedback of Ca<sup>2+</sup> induced Ca<sup>2+</sup> entry. In light of the discrepancy regarding TMEM16F ion selectivity recorded with various conditions, we set forth to test whether TMEM16F ion selectivity can be altered in response to changes of intracellular Ca<sup>2+</sup>. Having found that mutant Q559K channels showed minimal rundown with prolonged exposure to high cytoplasmic Ca<sup>2+</sup>, we determined its ion

selectivity at different  $\text{Ca}^{2+}$  concentrations, revealing a shift toward  $\text{Cl}^-$  selectivity at high intracellular  $\text{Ca}^{2+}$ . This shift of ion selectivity correlates with ion accessibility to the membrane electric field, which is determined by both ion concentration and membrane potential; divalent ions regardless of ion species are expected to exert stronger electrostatic effects than monovalent ions. This might reflect a general feature regarding a coupling of gating and permeation for channels in the TMEM16 family, and this coupling is also indicative of their intrinsic regulatory functions (*Figure 7G*).

Intracellular  $\text{Ca}^{2+}$  and membrane depolarization synergistically activate TMEM16F as well as  $\text{Ca}^{2+}$ -activated chloride channels, TMEM16A and TMEM16B (18). In TMEM16A, membrane depolarization contributes to TMEM16A activation partly through facilitating  $\text{Ca}^{2+}$  entry into the electric field of the  $\text{Ca}^{2+}$  binding pocket (18). High concentration of intracellular  $\text{Ca}^{2+}$  allows two  $\text{Ca}^{2+}$  ions to stably bind to the binding-pocket at all tested membrane potentials, so that the channel will be stabilized at an "Ohmic" state and is constantly open regardless of the membrane potential. The amino acid sequences of  $\text{Ca}^{2+}$ -binding sites are conserved across TMEM16 members, and mutation of some of these residues reduces the  $\text{Ca}^{2+}$ -sensitivity (6, 9). However, TMEM16F does not have an "Ohmic" state: the channel always requires depolarization to be activated. Simply increasing cytoplasmic  $\text{Ca}^{2+}$  concentration hinders activation because the  $\text{Ca}^{2+}$  induced degradation of  $\text{PIP}_2$  outweighs possible further activation by  $\text{Ca}^{2+}$ . Interestingly, Q559K channels show a left-shift of G-V relationship in 1 mM  $\text{Ca}^{2+}$ , possibly because  $\text{Ca}^{2+}$ -activation overcomes the desensitization resulting from loss of  $\text{PIP}_2$  (*Figure 1–figure supplement 2*). In addition, the depletion of  $\text{PIP}_2$  only desensitizes the  $\text{Ca}^{2+}$ -gating of Q559K, while wild-type channel exhibits both desensitization and rundown (*Figure 1A–D*). One possibility is that the lysine in TM5 stabilizes the pore and prevents rundown. Alternatively, the rundown may be a secondary indicator of the shift of voltage-dependent gating. Judging from the G-V relationships, at +80 mV wild-type TMEM16F is not as fully activated in 1 mM  $\text{Ca}^{2+}$  as in 15  $\mu\text{M}$   $\text{Ca}^{2+}$  (with  $\text{PIP}_2$ ) or as the Q559K mutant in 1 mM  $\text{Ca}^{2+}$  (*Figure 1–figure supplement 2*). In any case, both possibilities are consistent with the model that  $\text{PIP}_2$  facilitates  $\text{Ca}^{2+}$ -gating regulation by depolarization (11).

Recent studies of TMEM16A gating (17, 18) identify a glycine in TM6 as a hinge which allows the rearrangement of TM6 to generate the ion permeation pathway. Alanine substitution of the glycine for this hinge stabilizes the open conformation. In comparison, we found G615 in TMEM16F, the glycine at the corresponding position of G640 in TMEM16A, plays a similar role (*Figure 3*) (9, 10), while alanine substitution of the adjacent glycine (G614A) reduces  $\text{Ca}^{2+}$ -

sensitivity (*Figure 3—figure supplement 1E-G*). We could not find an amino acid in the lower segment of TMEM16F TM6 that plays a role similar to that of Q645 in TMEM16A, but the isoleucine at the upper segment (I612 in TMEM16F) has a function similar to that of I637 in TMEM16A (*Figure 3—figure supplement 1D, G*) (18), suggesting that the gating of TMEM16F ionic permeation pathway shares similar, but not identical mechanisms with TMEM16A. In TMEM16A,  $\text{Ca}^{2+}$ -binding may further change the electrostatic field of the permeation pathway and reduce the energy barrier that anions need to overcome to enter the pore (17). The possibility that charges in the binding pocket and in the pore can interact electrostatically, if applicable to TMEM16F, may provide an explanation for the observation that neutralization of the lysine in the permeation pathway of TMEM16F (K641A) increases the  $\text{Ca}^{2+}$  sensitivity (10).

It is intriguing to consider the basis for  $\text{Ca}^{2+}$  regulation of TMEM16F ion selectivity. Specifically, we wonder whether cations in the permeation pathway or in the  $\text{Ca}^{2+}$ -binding pocket may alter the electrostatic field of the pore. However, the fact that TM6 comprises both the gating segment and one of the pore-lining helices for the permeation pathway suggests that the physical proximity of these two "sites" makes it possible for either or both to contribute electrostatically (19, 20). Notably, in TMEM16A, introduction of negative charges to the pore can compensate for the neutralization of acidic amino acid residues in the gating pocket (17). Similarly, alteration of gating pocket charges also changes the rectification index, an indicator of ionic accessibility to the permeation pathway (17). Likewise, neutralization of basic amino acids in TMEM16F permeation pathway increases  $\text{Ca}^{2+}$ -sensitivity, while neutralization of acidic residues does the opposite (9). Thus, to alter one site without influencing the other is technically challenging. Meanwhile, the recently reported TMEM16K structure has multiple  $\text{Ca}^{2+}$  ions bound to its cytoplasmic domains (21), raising the question whether there could be a reservoir in the TMEM16 cytoplasmic region to store  $\text{Ca}^{2+}$ . Thus, to clearly identify the structural basis for  $\text{Ca}^{2+}$ -regulation of ion selectivity might require novel technologies.

Monovalent ion concentrations in physiological conditions do not change dramatically. But the shift of ion selectivity with elevation of  $\text{Ca}^{2+}$  concentration may provide a brake to the positive feedback of TMEM16F that is activated by  $\text{Ca}^{2+}$  to mediate permeation of cations including  $\text{Ca}^{2+}$ . In *Figure 7*, we can infer that the current at +80 mV recorded in 1 mM  $\text{Ca}^{2+}$  will be more " $\text{Cl}^-$ -selective" than calculated, since the hyperpolarizing ramp already leaves some time for intracellular  $\text{Ca}^{2+}$  to retreat from the membrane. The real "equilibrium point" where physiological cations and  $\text{Cl}^-$  are equally permeable through the TMEM16F channel, might not require intracellular  $\text{Ca}^{2+}$  as high as 1 mM and membrane potential as high as +80 mV. In a typical

neuronal cell, such an ion selectivity switch might reduce the entry of  $\text{Ca}^{2+}$  into the cell and increase the permeability of  $\text{Cl}^-$  to drive membrane potential close to  $\text{Cl}^-$  equilibrium potential, both of which terminate the excitatory signal and prevent  $\text{Ca}^{2+}$ -overloading. Whereas TMEM16A channels open only at depolarization when  $\text{Ca}^{2+}$  is low but display no voltage dependence in the open state when  $\text{Ca}^{2+}$  is high (18), TMEM16F might function differently with respect to its ion selectivity in response to changes in cytoplasmic  $\text{Ca}^{2+}$  concentration and membrane potential. It promotes excitation when both are low and inhibits excitation when both are high. Thus, these different members of the TMEM16 family may work as intrinsic regulatory machineries.

TMEM16F is also expressed in a variety of non-excitabile cells but its function has only been investigated in a limited number of cells, such as blood cells and immune cells (1-4). Many functional studies of TMEM16F focus on lipid scrambling, and more specifically, on the exposure of phosphatidylserine to the cell surface. Here, our studies indicate that TMEM16F might also play a role in regulating membrane potential, which may regulate cellular proliferation and differentiation (22). With the broad expression pattern of TMEM16F, we envision a new perspective to examine the functions of TMEM16F.

## Materials and Methods

*Cell Culture and Molecular Biology* - Mouse *Tmem16f* cDNA (sequence as in NCBI RefSeq NM\_175344.4) in pmCherry-N1 vector and *Tmem16a* in pEGFP-N1 vector were generated as previously reported (11, 23). Site-directed mutagenesis was performed using standard molecular techniques with pHusion polymerase (New England Biolabs, Ipswich, MA, USA) and sequences were all verified (Quintara Biosciences, South San Francisco, CA, USA). HEK293 cells were cultured in Dulbecco's Modified Eagle Medium (DMEM, with 4.5 g/L glucose, L-glutamine and sodium pyruvate, Mediatech, Manassas, VA, USA) containing 10% FBS (Axenia BioLogix, Dixon, CA, USA) and 1% penicillin-streptomycin, at 37°C and with 5%  $\text{CO}_2$ . Transient transfection was performed with Lipofectamine 2000 (ThermoFisher Scientific, Waltham, MA, USA) 2 days before recording. The cDNA constructs for wild-type TMEM16F-mCherry, the mutants Q559K-, G615A-, G614A-, I612A-, G614\_G615A-, N620A-, and E667Q- mCherry were stably transfected in HEK cells as previously reported (10). Briefly, the cDNAs were subcloned into pENTR1A (Addgene plasmid #17398) and transferred to pLenti CMV Hygro DEST (Addgene plasmid #17454) using Gateway cloning (24). pENTR1A no ccDB (w48-1) and pLenti

CMV Hygro DEST (w117-1) were gifts from Dr. Eric Campeau and Dr. Paul Kaufman (University of Massachusetts Medical School, Worcester, MA, USA). TMEM16F-mCherry pLenti was co-transfected into HEK293FT cells with packaging plasmids pMD.2G and psPAX2, which were gifts from Didier Trono (Addgene plasmids # 12259 and #12260). Lentivirus was harvested from the transfected cells 36-48 hours post-transfection and incubated with HEK293 cells to establish stable cell lines under hygromycin selection.

*Solutions* - For all electrophysiology recordings, bath solution contained 145 mM NaCl, 10 mM HEPES, 2 mM  $\text{CaCl}_2$ , 1 mM  $\text{MgCl}_2$ , 10 mM glucose, pH 7.2 with NaOH. For inside-out recordings, pipette solution contained 150 mM NaCl, 10 mM HEPES, 1 mM  $\text{CaCl}_2$ , unless otherwise stated. The membrane patch was excised to form inside-out configuration in  $\text{Ca}^{2+}$ -free solution: 150 mM NaCl, 10 mM HEPES, 2 mM EGTA. For solutions with  $\text{Ca}^{2+} < 100 \mu\text{M}$ ,  $\text{Ca}^{2+}$  was added to solutions containing 2 mM EGTA or 2 mM HEDTA, and the final concentration was confirmed with Fluo-3 or Oregon Green BAPTA 5N (ThermoFisher Scientific). For whole-cell recording, the pipette solution contained 150 mM NaCl, 10 mM HEPES, 5 mM HEDTA and 4.1 mM  $\text{CaCl}_2$ , and the final free  $\text{Ca}^{2+}$  concentration (15  $\mu\text{M}$ ) was confirmed with Oregon Green BAPTA 5N. The osmolality of each solution was adjusted to 290~310 mOsm/kg. For solutions with NaCl lower than 150 mM, the osmolality was balanced with addition of mannitol. All the chemicals were purchased from Sigma-Aldrich (St Louis, MO, USA).

*Electrophysiology* - Cells were lifted with trypsin-EDTA (Life Technologies, Carlsbad, CA, USA) and plated onto 12 mM coverslip (Warner Instruments, Hamden, CT, USA) 3~4 days before recording. For recording, coverslips with cells were transferred to a chamber on a Nikon-TE2000 Inverted Scope (Nikon Instruments, Melville, NY, USA) and transfection was confirmed with fluorescent microscopy. For measurements of reversal potentials, a 3 M KCl salt bridge was used. Based on prediction by Clampex (Molecular Devices, Sunnyvale, CA, USA), the liquid junction potentials for 15 mM NaCl, 45 mM NaCl were -1.7 mV and -1.0 mV respectively and were only corrected for calculation of permeability ratios ( $P_{\text{Na}^+}/P_{\text{Cl}^-}$ ). Patch borosilicate pipets (Sutter Instrument, Novato, CA, USA) were pulled from a Sutter P-97 puller with resistances of 2–3 M $\Omega$  for inside-out patch recordings. Solutions were puffed to the excised patch using VC3-8xP pressurized perfusion system (ALA Science, Farmingdale, NY, USA). Data were acquired using a Multiclamp 700B amplifier controlled by Clampex 10.2 via Digidata 1440A (Axon Instruments, Sunnyvale, CA, USA). All experiments were performed at room temperature (22–24°C).

**Data Analysis** - All data were analyzed using pClamp10 (Molecular Devices, Sunnyvale, CA, USA), OriginLab (OriginLab Corporation, Northampton, MA, USA), and Graphpad Prism (GraphPad Software, La Jolla, CA, USA). For the measurement of  $\text{Ca}^{2+}$ -sensitivity, every trace was fit to the Hill equation to generate its respective  $\text{EC}_{50}$  and H (Hill coefficient). The curves in the figures display the averaged current magnitudes normalized to their respective maximal values ( $I/I_{\text{max}}$  %).  $P_{\text{Na}^+}/P_{\text{Cl}^-}$  values were calculated with the Goldman-Hodgkin-Katz equation:

$$\Delta E_{\text{rev}} = 59 \times \log [(P_{\text{Na}^+} \times [\text{Na}^+]_{\text{o}} + P_{\text{Cl}^-} \times [\text{Cl}^-]_{\text{i}}) / (P_{\text{Na}^+} \times [\text{Na}^+]_{\text{i}} + P_{\text{Cl}^-} \times [\text{Cl}^-]_{\text{o}})],$$

where  $[\text{Na}^+]_{\text{o}}$ ,  $[\text{Cl}^-]_{\text{o}}$ ,  $[\text{Na}^+]_{\text{i}}$ , and  $[\text{Cl}^-]_{\text{i}}$  are extracellular and intracellular  $\text{Na}^+$  and  $\text{Cl}^-$  concentrations, respectively.

Significant differences were determined with Student's *t*-test and ANOVA unless otherwise stated. In all cases, data represent mean  $\pm$  SEM, \*  $P < 0.05$ , \*\*  $P < 0.01$ , \*\*\*  $P < 0.001$ , \*\*\*\*  $P < 0.0001$ , n.s.  $p > 0.05$ .

## Acknowledgments

We thank Dr. Christian Peters and Dr. John M. Gilchrist (University of California, San Francisco) for their critical reading of the manuscript and for helpful discussions. This study is supported in part by NIH Grants R01NS069229 (to L.Y.J.), F32HD089639 (to M. H.) and by a grant from The Jane Coffin Childs Memorial Fund for Medical Research (to T.W.H.). Y.N.J. and L.Y.J. are Howard Hughes Medical Institute investigators.

## Footnotes

Author contributions: W.Y., T.W.H., M.H. and L.Y.J. designed research; W.Y., T.W.H. and M.H. performed research; W.Y. and T.W.H. contributed new reagents/analytic tools; W.Y. analyzed data; and W.Y. wrote the manuscript and all the authors proofread and revised the manuscript.

The authors declare no conflict of interest.



## Reference

1. Whitlock JM & Hartzell HC (2017) Anoctamins/TMEM16 Proteins: Chloride Channels Flirting with Lipids and Extracellular Vesicles. *Annu Rev Physiol* 79:119-143.
2. Falzone ME, Malvezzi M, Lee BC, & Accardi A (2018) Known structures and unknown mechanisms of TMEM16 scramblases and channels. *J Gen Physiol* 150(7):933-947.
3. Bevers EM & Williamson PL (2016) Getting to the Outer Leaflet: Physiology of Phosphatidylserine Exposure at the Plasma Membrane. *Physiol Rev* 96(2):605-645.
4. Pedemonte N & Galiotta LJ (2014) Structure and function of TMEM16 proteins (anoctamins). *Physiol Rev* 94(2):419-459.
5. Suzuki J, Umeda M, Sims PJ, & Nagata S (2010) Calcium-dependent phospholipid scrambling by TMEM16F. *Nature* 468(7325):834-838.
6. Yang H, *et al.* (2012) TMEM16F forms a  $\text{Ca}^{2+}$ -activated cation channel required for lipid scrambling in platelets during blood coagulation. *Cell* 151(1):111-122.
7. Hu Y, *et al.* (2016) Scramblase TMEM16F terminates T cell receptor signaling to restrict T cell exhaustion. *J Exp Med* 213(12):2759-2772.
8. Zaitseva E, *et al.* (2017) Fusion Stage of HIV-1 Entry Depends on Virus-Induced Cell Surface Exposure of Phosphatidylserine. *Cell Host Microbe* 22(1):99-110 e117.
9. Alvadia C, *et al.* (2018) Cryo-EM structures and functional characterization of the lipid scramblase TMEM16F. *BioRxiv* 455261.
10. Han T, *et al.* (2019) Chemically induced vesiculation as a platform for studying TMEM16F activity. *Proc Natl Acad Sci U S A*.
11. Ye W, *et al.* (2018) Phosphatidylinositol-(4, 5)-bisphosphate regulates calcium gating of small-conductance cation channel TMEM16F. *Proc Natl Acad Sci U S A* 115(7):E1667-E1674.
12. Yu K, *et al.* (2015) Identification of a lipid scrambling domain in ANO6/TMEM16F. *Elife* 4:e06901.
13. Grubb S, *et al.* (2013) TMEM16F (Anoctamin 6), an anion channel of delayed  $\text{Ca}^{2+}$  activation. *J Gen Physiol* 141(5):585-600.
14. Scudieri P, *et al.* (2015) Ion channel and lipid scramblase activity associated with expression of TMEM16F/ANO6 isoforms. *J Physiol* 593(17):3829-3848.
15. Shimizu T, *et al.* (2013) TMEM16F is a component of a  $\text{Ca}^{2+}$ -activated  $\text{Cl}^-$  channel but not a volume-sensitive outwardly rectifying  $\text{Cl}^-$  channel. *Am J Physiol Cell Physiol* 304(8):C748-759.
16. Tian Y, Schreiber R, & Kunzelmann K (2012) Anoctamins are a family of  $\text{Ca}^{2+}$ -activated  $\text{Cl}^-$  channels. *J Cell Sci* 125(Pt 21):4991-4998.
17. Lam AK & Dutzler R (2018) Calcium-dependent electrostatic control of anion access to the pore of the calcium-activated chloride channel TMEM16A. *Elife* 7.
18. Peters CJ, *et al.* (2018) The Sixth Transmembrane Segment Is a Major Gating Component of the TMEM16A Calcium-Activated Chloride Channel. *Neuron* 97(5):1063-1077 e1064.



19. Paulino C, Kalienkova V, Lam AKM, Neldner Y, & Dutzler R (2017) Activation mechanism of the calcium-activated chloride channel TMEM16A revealed by cryo-EM. *Nature* 552(7685):421-425.
20. Dang S, *et al.* (2017) Cryo-EM structures of the TMEM16A calcium-activated chloride channel. *Nature* 552(7685):426-429.
21. Bushell S, *et al.* (2018) The structural basis of lipid scrambling and inactivation in the endoplasmic reticulum scramblase TMEM16K. *BioRxiv* 447417.
22. Sundelacruz S, Levin M, & Kaplan DL (2009) Role of membrane potential in the regulation of cell proliferation and differentiation. *Stem Cell Rev* 5(3):231-246.
23. Tien J, *et al.* (2014) A comprehensive search for calcium binding sites critical for TMEM16A calcium-activated chloride channel activity. *Elife* 3.
24. Campeau E, *et al.* (2009) A versatile viral system for expression and depletion of proteins in mammalian cells. *PLoS One* 4(8):e6529.

# Figure 1

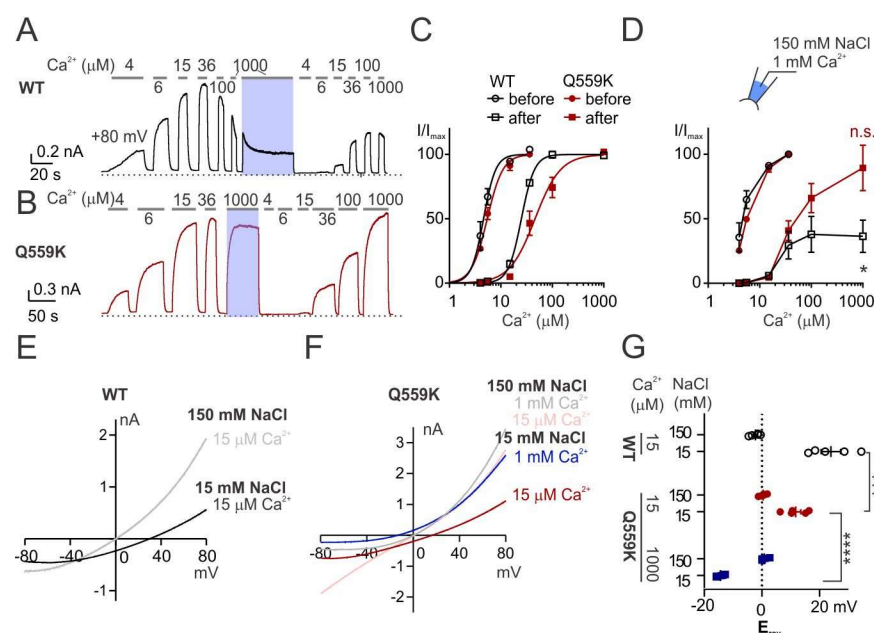

**Figure 1. TMEM16F Q559K shifts its reversal potential in response to change of intracellular  $\text{Ca}^{2+}$  concentration.** (A, B) Representative recordings of TMEM16F wild type (WT) and Q559K in different  $\text{Ca}^{2+}$  concentrations. Traces were recorded from transfected HEK cells and the inside-out patches were held at +80 mV. The shades illustrate 1-minute treatment with 1 mM  $\text{Ca}^{2+}$  that catalyzes  $\text{PIP}_2$  degradation by membrane-tethered phospholipase. (C) Dose-response curves for  $\text{Ca}^{2+}$ -activation of WT and Q559K before and after 1 mM  $\text{Ca}^{2+}$  treatment respectively. Currents before and after 1 mM  $\text{Ca}^{2+}$  were separately fitted to Hill equation and normalized to their respective maximal amplitudes. (D) Change of current magnitudes of WT and Q559K. The currents were normalized to the maximal magnitudes before 1 mM  $\text{Ca}^{2+}$  for each cell. \*  $P < 0.05$  (One sample  $t$  test against hypothetical value "1"). (E, F) Representative I-V relationships of WT and Q559K recorded in indicated conditions. The traces were recorded with a hyperpolarizing ramp from +80 mV to -80 mV (-1 V/s) following holding at +80 mV. (G) Scatter plot of reversal potentials ( $E_{\text{rev}}$ ) obtained from traces as in E and F.  $P$  values were determined with Sidak's multiple comparisons following two-way ANOVA.

# Figure 1\_Figure supplement 1

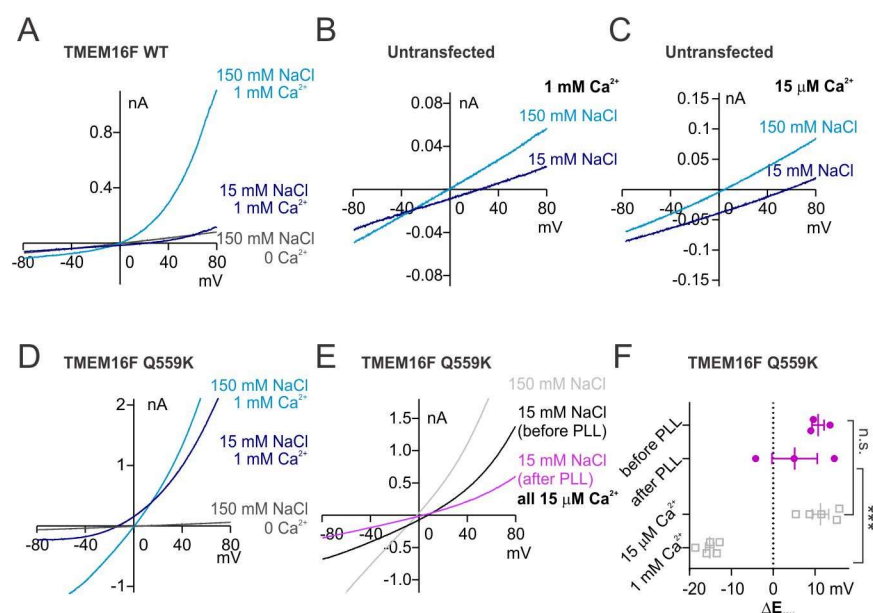

**Figure 1-figure supplement 1.** (A~D) Representative I-V relationships of currents recorded in indicated conditions. The recording protocol was the same as in Figure 1. Wild-type TMEM16F current in 1 mM  $\text{Ca}^{2+}$  is not distinguishable from HEK cell endogenous currents. (E) Representative I-V relationships of TMEM16F Q559K current before and after poly-L-lysine (PLL) treatment. The traces were recorded with a hyperpolarizing ramp from +80 mV to -80 mV (-1 V/s) following holding at +160 mV. (F) Scatter plot of the change of reversal potentials ( $\Delta E_{\text{rev}}$ ) when solution is switched from 150 mM NaCl to 15 mM NaCl. The gray values were replotted from Figure 1G. *P* values were determined with Sidak's multiple comparisons following two-way ANOVA.

# Figure 1\_Figure supplement 2

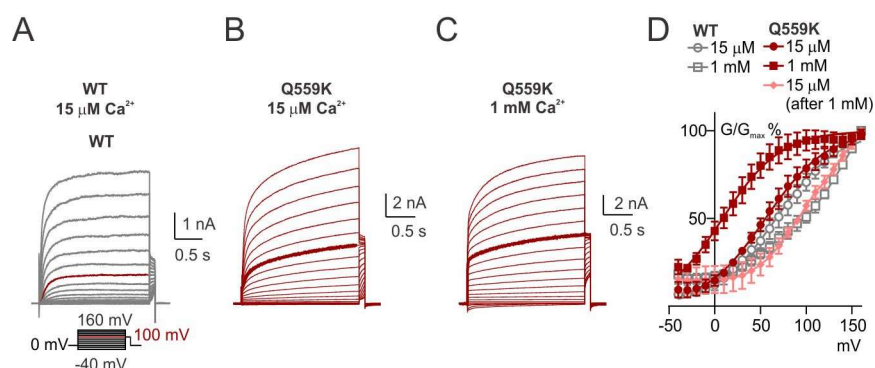

**Figure 1-figure supplement 2.** (A~C) Representative traces recorded with a voltage family protocol from -40 mV to +160 mV with 10 mV increment followed by holding at +100 mV. The traces recorded at +100 mV are highlighted for comparison. (D) Averaged G-V relationships of the currents recorded in indicated conditions. Tail current (at +100 mV) magnitudes were measured from traces as in A~C. For WT and Q559K in 15  $\mu\text{M}$   $\text{Ca}^{2+}$  and Q559K in 1 mM  $\text{Ca}^{2+}$ , currents of each cell were fitted to sigmoidal equation and the current magnitudes were normalized to their respective maximal values. For WT in 1 mM  $\text{Ca}^{2+}$  and Q559K after 1 mM  $\text{Ca}^{2+}$  treatment, the current magnitudes were directly normalized to their values at +160 mV.

# Figure 1\_Figure supplement 3

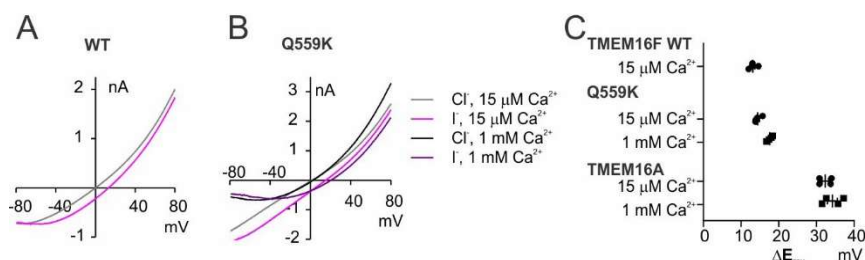

**Figure 1-figure supplement 3.** (A, B) Representative I-V relationships of currents recorded in indicated conditions showing the shift of reversal potentials when the bath (intracellular) solution was switched from 150 mM NaCl to 150 mM NaI. (C) Scatter plot of the change of reversal potentials ( $\Delta E_{rev}$ ) when solution was switched from 150 mM NaCl to 150 mM NaI. Because the interpretation methods for bi-ionic condition were not applicable here, we did **NOT** perform statistics and instead showed the values directly.

## Figure 2

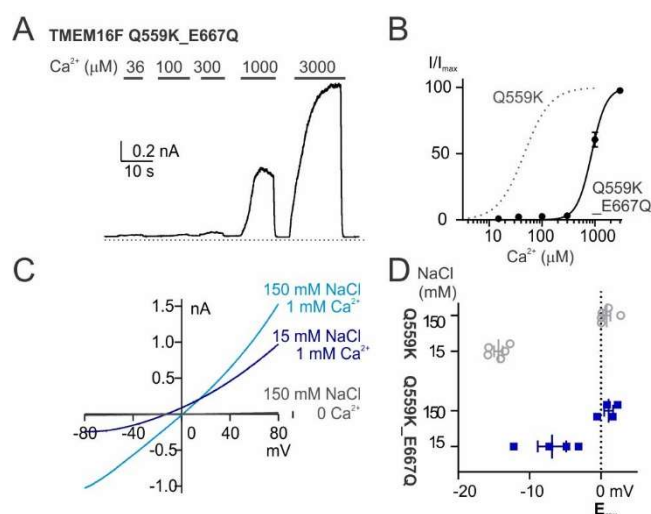

**Figure 2. TMEM16F Q559K\_E667Q current is  $\text{Cl}^-$ -selective in 1 mM  $\text{Ca}^{2+}$  despite being half activated.** (A) Representative recordings of TMEM16F Q559K\_E667Q in different  $\text{Ca}^{2+}$  concentrations. The recording protocol was the same as in Figure 1A. (B) Dose-response curves for  $\text{Ca}^{2+}$ -activation of Q559K\_E667Q. The gray dotted line represents the curve for Q559K after 1 mM  $\text{Ca}^{2+}$ , replotted from Figure 1C. (C) Representative I-V relationships of Q559K\_E667Q recorded in indicated conditions. The recording protocol was the same as in Figure 1E. (D) Scatter plot of reversal potentials ( $E_{\text{rev}}$ ) obtained from traces as in C. The gray values were replotted from Figure 1G for comparison.

## Figure 3

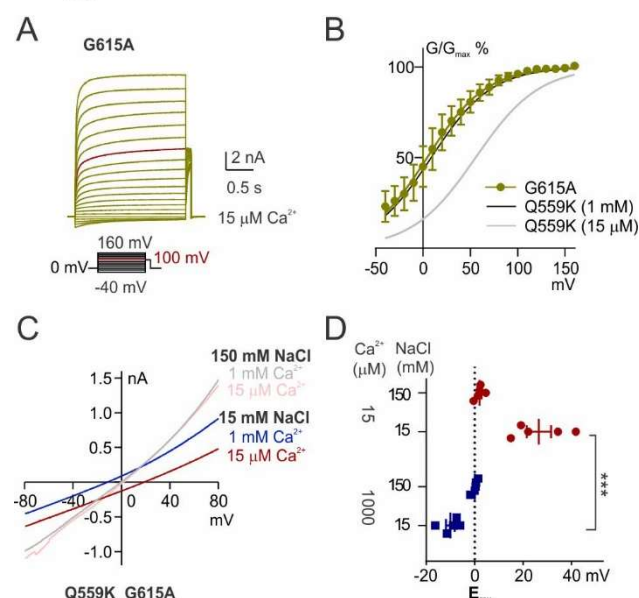

**Figure 3. The shift of ion selectivity is preserved despite TM6 conformational fixation.** (A) Representative trace of G615A recorded with a voltage family protocol. The current recorded at +100 mV is highlighted for comparison. (B) Averaged G-V relationships of G615A currents. The method for data analysis was the same as that for WT in 15  $\mu$ M  $\text{Ca}^{2+}$ . The two traces for Q559K were replotted from *Figure 1\_Supplement 2D*. (C) Representative I-V relationships of Q559K\_G615A recorded in indicated conditions. (D) Scatter plot of reversal potentials ( $E_{\text{rev}}$ ) obtained from traces as in C.  $P$  values were determined with Sidak's multiple comparisons following two-way ANOVA.



# Figure 3\_Figure supplement 1

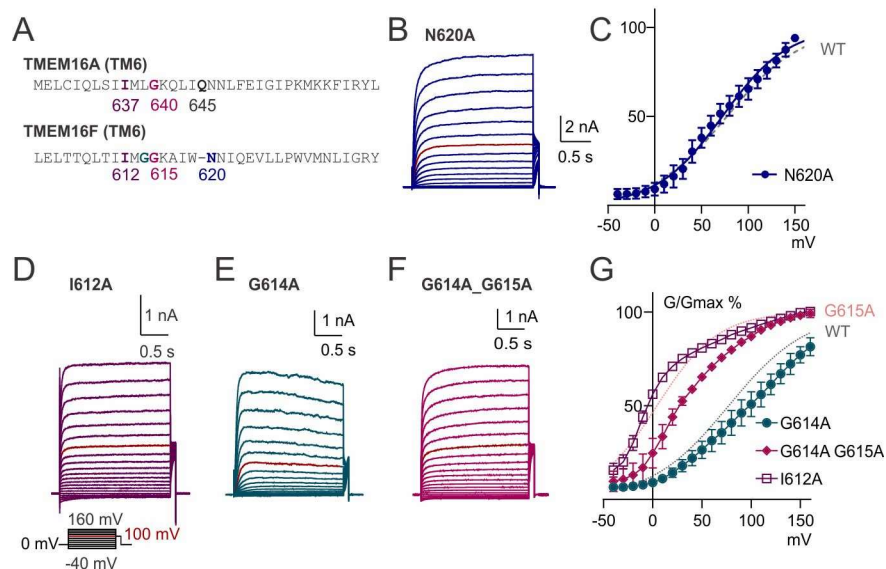

**Figure 3-figure supplement 1.** (A) Alignment of TM6 sequences of TMEM16A and TMEM16F. The numbering for TMEM16A represents the isoform as used by Peters, C et al. (18). (B, D~F). Representative traces of TMEM16F mutants recorded in 15  $\mu$ M  $\text{Ca}^{2+}$  with a voltage family protocol as in *Figure 1\_Supplement 2*. Currents recorded at +100 mV are highlighted for comparison. (C, G) Averaged G-V relationships of indicated TMEM16F mutants. The method for data analysis was the same as that for WT in 15  $\mu$ M  $\text{Ca}^{2+}$ . The traces for WT and G615A were replotted from *Figure 1\_Supplement 2D* and *Figure 3B*.

## Figure 4

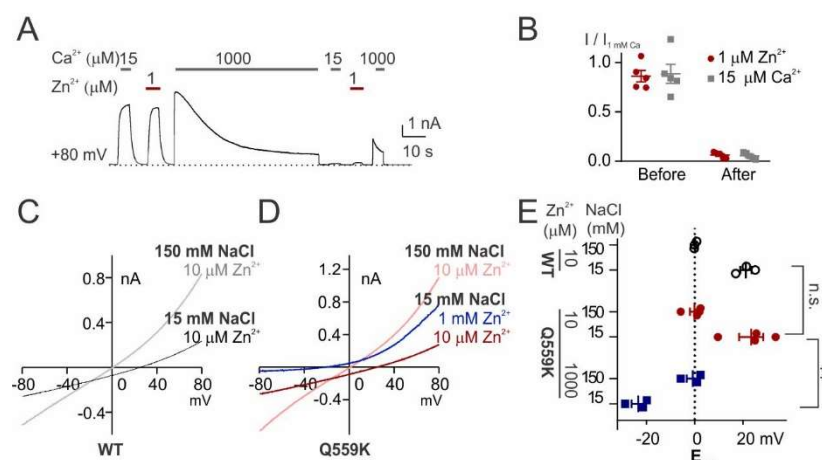

**Figure 4. The shift of ion selectivity is preserved when current is activated by Zn<sup>2+</sup>**  
 (A) Representative recordings of WT TMEM16F current in response to indicated concentrations of Zn<sup>2+</sup> and Ca<sup>2+</sup>. (B) Scatter plot showing the current magnitudes activated by indicated concentrations of Zn<sup>2+</sup> and Ca<sup>2+</sup> normalized to those by 1 mM Ca<sup>2+</sup> respectively before and after prolonged treatment of 1 mM Ca<sup>2+</sup>, suggesting that Zn<sup>2+</sup> activation was also desensitized. Two-way ANOVA suggests there is no significant difference between the two activators, but there is significant difference before and after 1 mM Ca<sup>2+</sup>. (C, D) Representative I-V relationships of WT and Q559K recorded in indicated conditions. The currents were recorded with the same protocol as in Figure 1E, F. (E) Scatter plot of reversal potentials (E<sub>rev</sub>) obtained from traces as in C and D. *P* values were determined with Sidak's multiple comparisons following two-way ANOVA.

# Figure 4\_Figure supplement 1

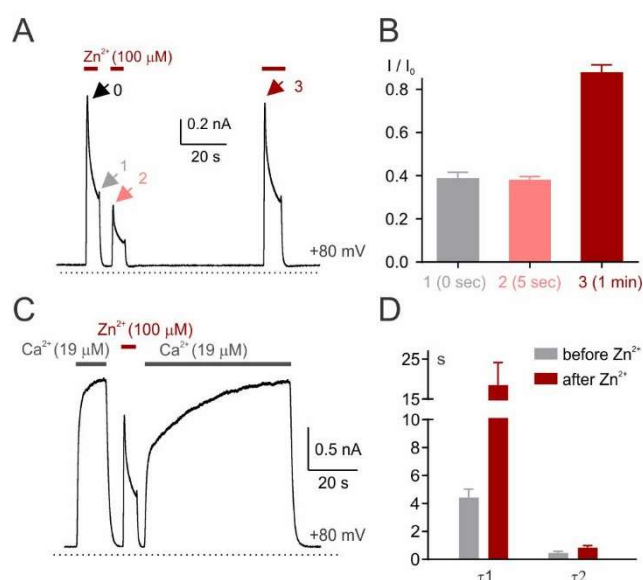

**Figure 4-figure supplement 1.** (A) Representative recordings of WT TMEM16F current in response to multiple applications of  $Zn^{2+}$ . (B) Averaged current magnitudes measured at arrowed time points normalized to the respective initial magnitudes ( $I_0$ ), indicating that  $Zn^{2+}$ -inactivation is reversible, not due to  $PIP_2$  depletion. (C) Representative recordings of WT TMEM16F current showing  $Ca^{2+}$  activation is not desensitized by  $Zn^{2+}$ -treatment, although the activation is slower. (D) Averaged time constants for  $Ca^{2+}$ -activation. The time constants were obtained by fitting the activation trace with a two-term exponential curve.

## Figure 5

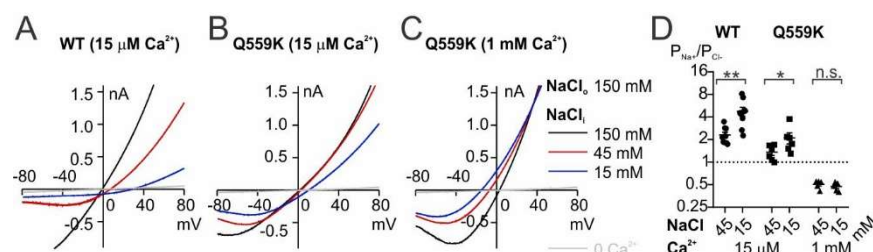

**Figure 5. Ion selectivity is shifted with the change of intracellular NaCl concentration.** (A) Representative I-V relationships of WT and Q559K recorded in indicated conditions. The currents were recorded with the same methods as in *Figure 1E, F*. Notice **NOT** to directly compare the shift of  $E_{rev}$  because the intracellular NaCl concentrations are varying. (D) Scatter plot showing the permeability ratio ( $P_{Na^+}/P_{Cl^-}$ ) calculated from the shift of reversal potentials ( $\Delta E_{rev}$ ) obtained from traces as in A, B and C.  $P$  value for WT was determined with Wilcoxon test.  $P$  values for Q559K were determined with Sidak's multiple comparisons following two-way ANOVA.

## Figure 6

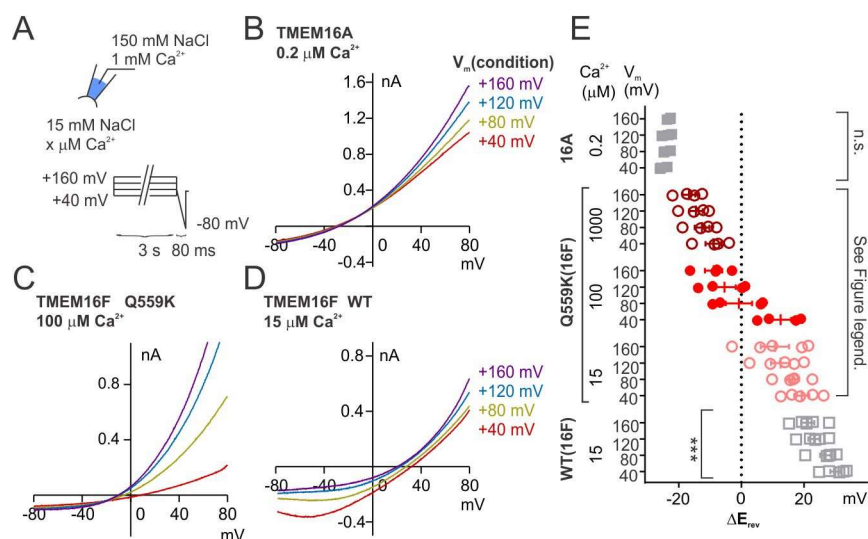

**Figure 6. Synergy between  $\text{Ca}^{2+}$  and depolarization in shifting ion selectivity.** (A) Recording methods. Briefly, the excised patch was held at +40 to +160 mV with an increment of 40 mV ("condition potentials") followed by a hyperpolarizing ramp from +80 mV to -80 mV (-2 V/s), and the reversal potentials were recorded in various  $\text{Ca}^{2+}$  concentrations. (B~D) Representative I-V relationships of currents recorded in indicated conditions. (E) Scatter plot of the change of reversal potentials ( $\Delta E_{\text{rev}}$ ) when solution was switched from 150 mM NaCl to 15 mM NaCl. For TMEM16A and WT TMEM16F,  $P$  values were determined with one-way ANOVA. For TMEM16F Q559K, two-way ANOVA shows  $P < 0.0001$  across voltages,  $P < 0.001$  across  $\text{Ca}^{2+}$  concentrations, and  $P < 0.001$  in their interaction.

# Figure 6\_Figure supplement 1

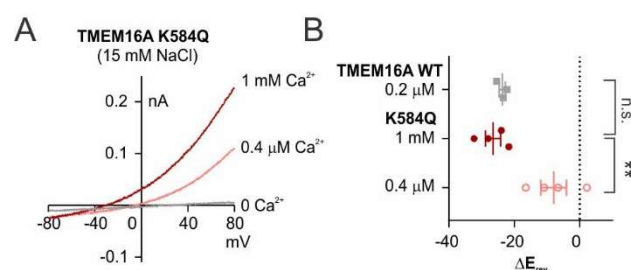

**Figure 6-figure supplement 1.** (A) Representative I-V relationships of TMEM16A K584Q currents recorded in indicated concentrations of  $\text{Ca}^{2+}$  in 15 mM NaCl bath solution. (B) Scatter plot of the change of reversal potentials ( $\Delta E_{\text{rev}}$ ) when solution was switched from 150 mM NaCl to 15 mM NaCl. *P* values were determined with Sidak's multiple comparisons following one-way ANOVA.

# Figure 7

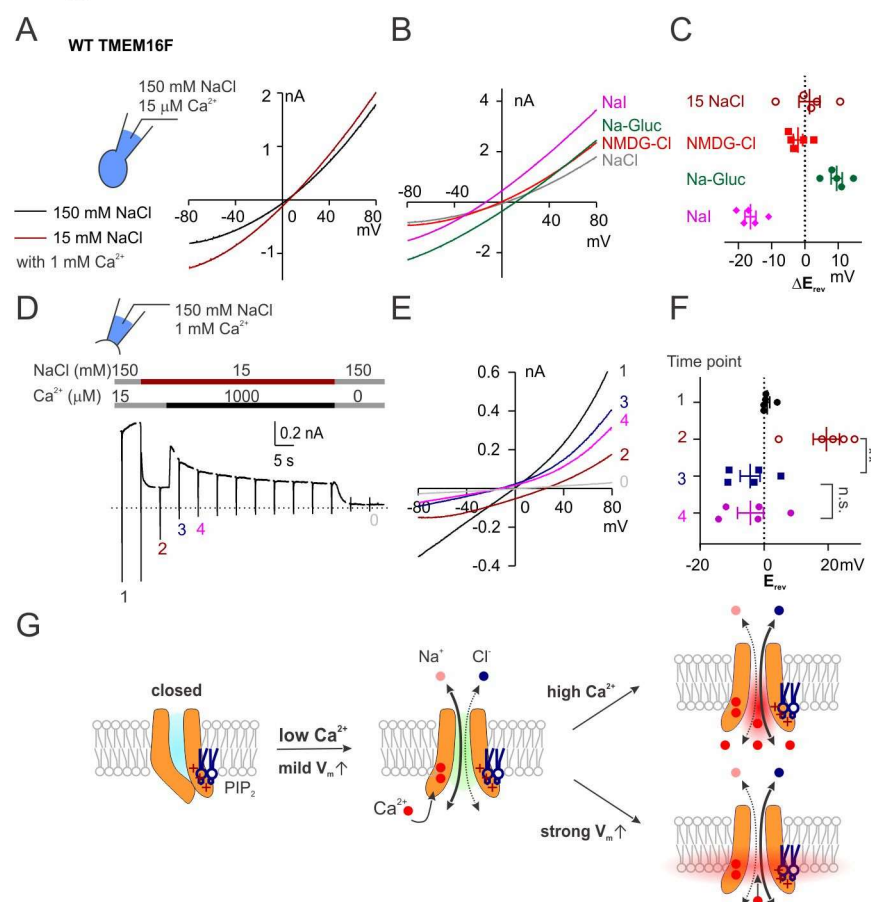

**Figure 7. WT TMEM16F is transiently Cl<sup>-</sup>-selective in response to high cytoplasmic Ca<sup>2+</sup>.** (A, B) Representative I-V relationships of wild-type TMEM16F currents recorded with whole-cell configuration in indicated bath solution. NMDG: N-methyl-D-glucamine; Gluc: gluconate. (C) Scatter plot of the change of reversal potentials ( $\Delta E_{rev}$ ) from recordings as in A and B. Due to the potentially varying  $P_{\text{Na}^+}/P_{\text{Cl}^-}$ , we did **NOT** perform statistics or use them to calculate ion permeability ratios. (D) Representative recordings of WT TMEM16F held at +80 mV with a hyperpolarizing ramp (-1 V/s) once every 5 seconds. (E) Representative I-V relationships of currents recorded at arrowed time points. (F) Scatter plot of the reversal potentials ( $E_{rev}$ ) at arrowed time points. *P* values were determined with Tukey's multiple comparisons following one-way ANOVA. (G) Diagrams showing the synergy between intracellular Ca<sup>2+</sup> and membrane depolarization in shifting ion selectivity via altering the electrostatic field along the permeation pathway
